# Supplementary material
Source: PubMed Central journal article supplement (PMC8062786)
Supplement: mmc1.pdf [file mmc1.pdf]

## Supplementary data

Table SI: Inter- and intra-interactions of SARS 3CL<sup>pro</sup> dimers

Atom pairs in the interacting amino acid residues with minimal contact distances (< 3.5 Å) are listed.

| Residue 1                                         | Atom 1 | Residue 2 | Atom 2 | Distance (Å) |
|---------------------------------------------------|--------|-----------|--------|--------------|
| <b>Interactions of N-terminus from protomer A</b> |        |           |        |              |
| A Ser1                                            | Og     | B Glu166  | OE2    | 2.56         |
| A Ser1                                            | N      | B Glu166  | OE1    | 2.48         |
| A Ser1                                            | N      | B His172  | N      | 2.83         |
| A Gly2                                            | O      | B Ser139  | Og     | 2.90         |
| A Lys5                                            | N      | AGlu290   | OE1    | 2.53         |
| A Ala7                                            | N      | B Val125  | O      | 3.01         |
| A Ala7                                            | O      | B Val125  | N      | 2.74         |
| <b>Interactions of N-terminus from protomer B</b> |        |           |        |              |
| B Ser1                                            | N      | AGlu166   | OE1    | 2.95         |
| B Ser1                                            | N      | A His172  | N      | 3.16         |
| B Ala7                                            | N      | A Val125  | O      | 3.04         |
| B Ala7                                            | O      | A Val125  | N      | 2.80         |
| <b>Interactions of C-terminus from protomer A</b> |        |           |        |              |
| A Ser301                                          | N      | A Val297  | N      | 2.62         |
| A Val303                                          | O      | B Ser123  | Og     | 3.53         |
| A Gln306                                          | OE1    | A Lys12   | NZ     | 3.19         |

Scheme S1. Synthesis of AG7088 (Compound 1)

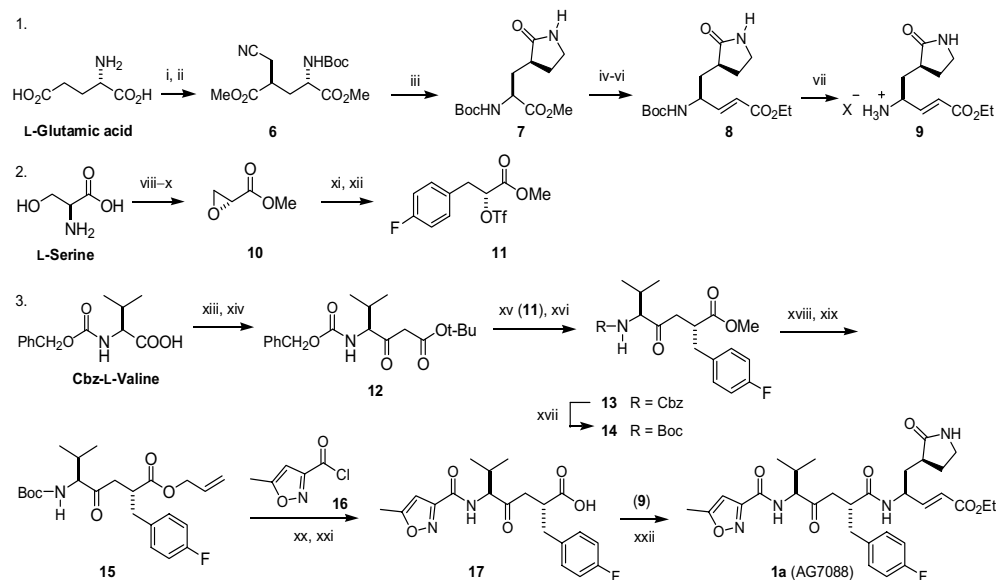

**Reagents and conditions:** (i)  $\text{Me}_3\text{SiCl}$ , MeOH, 0 °C, 18 h; then  $\text{Boc}_2\text{O}$ ,  $\text{Et}_3\text{N}$ , 0–25 °C, 4 h; 96%. (ii)  $\text{LiN}(\text{SiMe}_3)_2$ , THF, –78 °C, 3 h; then  $\text{BrCH}_2\text{CN}$ , 3.5 h; 82%. (iii)  $\text{H}_2$ , cat.  $\text{PtO}_2$ , MeOH,  $\text{CHCl}_3$ , 25 °C, 12 h; then NaOAc, reflux, 12 h; 81%. (iv)  $\text{NaBH}_4$ , LiCl, THF, EtOH, 25 °C, 18 h; 89%. (v) pyridine- $\text{SO}_3$ ,  $\text{Me}_2\text{SO}$ ,  $\text{CH}_2\text{Cl}_2$ , (*i*-Pr) $_2\text{NEt}$ , –10 °C, 3 h. (vi)  $[\text{EtO}_2\text{CCHPO}(\text{OEt})_2]^- \text{Na}^+$ , THF, –78 °C, 1 h; 75% yield for two steps. (vii) HCl, 1,4-dioxane, rt, 2 h. (viii) HBr,  $\text{NaNO}_2$ , KBr,  $\text{H}_2\text{O}$ , –10 °C, 12 h. (ix) KOH, EtOH, 0 °C, 12 h. (x)  $\text{Me}_2\text{SO}_4$ ,  $\text{CH}_2\text{Cl}_2$ , cat.  $(\text{PhCH}_2)_3\text{Et}_3\text{N}^+ \text{Cl}^-$ , rt, 24 h; 70% for three steps. (xi) 4- $\text{FC}_6\text{H}_4\text{MgBr}$ ,  $\text{CuBr}\cdot\text{Me}_2\text{S}$ , THF, –35 °C, 1 h; 86%. (xii)  $(\text{CF}_3\text{SO}_2)_2\text{O}$ , 2,6-lutidine,  $\text{CH}_2\text{Cl}_2$ , 0 °C, 40 min. (xiii) 1,1'-carbonyldiimidazole, THF, rt, 1 h. (xiv)  $\text{CH}_3\text{CO}_2\text{-}t\text{-Bu}$ ,  $\text{LiN}(\text{i-Pr})_2$ , THF, –78 °C, 1 h; 65%. (xv) NaH, THF, 0 °C, 30 min; then triflate **11**, THF, 0 °C to rt, 24 h. (xvi)  $\text{CF}_3\text{CO}_2\text{H}$ ,  $\text{CH}_2\text{Cl}_2$ , rt, 24 h; 71% for two steps. (xvii)  $\text{H}_2$ , Pd/C,  $\text{Boc}_2\text{O}$ , MeOH, rt, 10 h; 83%. (xviii) LiOH (1.1 equiv),  $\text{H}_2\text{O}$ , 1 h, 0 °C; 90%. (xix) allyl iodide,  $\text{Cs}_2\text{CO}_3$ , DMF, 45 °C, 5 h; 85%. (xx) *N*-methylmorpholine (NMM),  $\text{CH}_2\text{Cl}_2$ , 0–25 °C, 2 h; 88%. (xxi)  $\text{Pd}(\text{PPh}_3)_4$ , morpholine, THF, 25 °C, 3 h; 84%. (xxii) HOBt, EDCI, (*i*-Pr) $_2\text{NEt}$ ,  $\text{CH}_2\text{Cl}_2$ , 0–25 °C, 20 h; 70%.

Scheme S2. Combinatorial synthesis of peptide conjugated esters **2a–d** and **4a–d**.

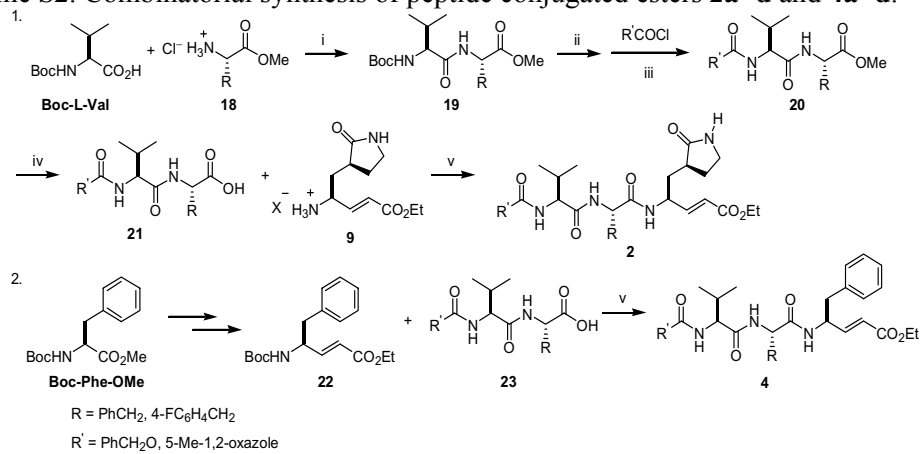

*Reagents and conditions:* (i) DCC, HOBT, Et<sub>3</sub>N, DMF, CH<sub>2</sub>Cl<sub>2</sub>, 0–25 °C, 12–24 h; 81–89%. (ii) CF<sub>3</sub>CO<sub>2</sub>H, CH<sub>2</sub>Cl<sub>2</sub>, 25 °C, 3 h. (iii) NMM, CH<sub>2</sub>Cl<sub>2</sub>, 0–25 °C, 4 h. (iv) LiOH, MeOH, 0 °C, 2 h. (v) HOBT, EDCI, (*i*-Pr)<sub>2</sub>NEt, CH<sub>2</sub>Cl<sub>2</sub>, 0–25 °C, 20 h.
